# Supplementary material for: SNAP25 disease mutations change the energy landscape for synaptic exocytosis due to aberrant SNARE interactions
Source: eLife journal article supplement (doi:10.7554/elife.88619), 2023-07-12
Supplement: fig2-data1 [file elife-88619-fig2-data1-v1.zip]

## Sheet: Sheet1
Figure 2 + 10
	Property	SNAP25 variant expressed	mean ± SEM	Statistical analysis (comparison to WT)	n
Figure 2 + 10	Number of synapses	WT	659.6 ± 84.71		16
	Number of synapses	V48F	791.5 ± 114.5	ns p=0.6000 (one-way ANOVA)	14
	Number of synapses	D166Y	674.4 ± 70.88	ns p=0.9987 (one-way ANOVA)	17
	Number of synapses	I67N	384.1 ± 88.68	ns p=0.1462 (one-way ANOVA)	9
	Total dendritic length (µm)	WT	3303 ± 516.0		16
	Total dendritic length (µm)	V48F	4281 ± 588.7	ns p=0.2889 (one-way ANOVA)	14
	Total dendritic length (µm)	D166Y	3824 ± 360.8	ns p=0.6565 (one-way ANOVA)	17
	Total dendritic length (µm)	I67N	2121 ± 444.7	ns p=0.1374 (Unpaired t test)	9
	WB: EGFP-SNAP25 intensity (divided by VCP and normalized to WT)	WT	1.00 ± 0.271		3
	WB: EGFP-SNAP25 intensity (divided by VCP and normalized to WT)	V48F	1.167 ± 0.423	ns p=0.9101 (one-way ANOVA)	3
	WB: EGFP-SNAP25 intensity (divided by VCP and normalized to WT)	D166Y	1.148 ± 0.255	ns p=0.929 (one-way ANOVA)	3
	WB: endogenous SNAP25 intensity (divided by VCP and normalized to WT)	WT	1.00 ± 0.098		3
	WB: endogenous SNAP25 intensity (divided by VCP and normalized to WT)	V48F	0.902 ± 0.135	ns p=0.779 (one-way ANOVA)	3
	WB: endogenous SNAP25 intensity (divided by VCP and normalized to WT)	D166Y	0.865 ± 0.109	ns p=0.639 (one-way ANOVA)	3
	WB: EGFP-SNAP25 intensity (divided by VCP and normalized to WT)	WT	1.00 ± 0.2704		3
	WB: EGFP-SNAP25 intensity (divided by VCP and normalized to WT)	I67N	0.956 ± 0.143	ns p=0.8919 (unpaired t-test)	3
	WB: endogenous SNAP25 intensity (divided by VCP and normalized to WT)	WT	1.00 ± 0.098		3
	WB: endogenous SNAP25 intensity (divided by VCP and normalized to WT)	I67N	0.9216 ± 0.101	ns p=0.6086 (unpaired t-test)	3
	Neurons per glial islet	WT	1.201 ± 0.087		32
	Neurons per glial islet	WT+V48F	0.8194 ± 0.096	* p= 0.0298 (Brown-Forsythe and Welch ANOVA)	12
	Neurons per glial islet	V48F	0.9833 ± 0.101	ns p= 0.4327 (Brown-Forsythe and Welch ANOVA)	20
	Neurons per glial islet	WT+D166Y	0.9635 ± 0.142	ns p= 0.5799 (Brown-Forsythe and Welch ANOVA)	16
	Neurons per glial islet	D166Y	0.7500 ± 0.075	** p= 0.0015 (Brown-Forsythe and Welch ANOVA)	16
	Neurons per glial islet	WT	0.6394 ± 0.052		52
	Neurons per glial islet	WT+I67N	0.5038 ± 0.041	ns p= 0.1267 (Brown-Forsythe and Welch ANOVA)	44
	Neurons per glial islet	I67N	0.2917 ± 0.030	**** p<0.0001 (Brown-Forsythe and Welch ANOVA)	52
	Neurons per glial islet	SNAP25 KO	0.06944 ± 0.025	**** p<0.0001 (Brown-Forsythe and Welch ANOVA)	12
