# Supplementary material for: SNAP25 disease mutations change the energy landscape for synaptic exocytosis due to aberrant SNARE interactions
Source: eLife journal article supplement (doi:10.7554/elife.88619), 2023-07-12
Supplement: fig3-data1 [file elife-88619-fig3-data1-v1.zip]

## Sheet: Sheet1
Figure 3 + 10
	Property	SNAP25 variant expressed	mean ± SEM	Statistical analysis (comparison to WT)	n
Figure 3 + 10	mEPSC frequency (Hz)	WT	1.945 ± 0.300		49
	mEPSC frequency (Hz)	WT+V48F	5.879 ± 0.850	*** p=0.0001 (Brown-Forsythe and Welch ANOVA)	47
	mEPSC frequency (Hz)	V48F	12.87 ± 1.307	**** p<0.0001 (Brown-Forsythe and Welch ANOVA)	48
	mEPSC frequency (Hz)	WT	1.454 ± 0.235		54
	mEPSC frequency (Hz)	WT+D166Y	6.108 ± 0.956	**** p<0.0001 (Brown-Forsythe and Welch ANOVA)	43
	mEPSC frequency (Hz)	D166Y	13.38 ± 1.255	**** p<0.0001 (Brown-Forsythe and Welch ANOVA)	50
	mEPSC frequency (Hz)	Syt1 WT	1.613 ± 0.340		28
	mEPSC frequency (Hz)	Syt1 KO	10.30 ± 1.259	**** p<0.0001 (Welch's t test)	26
	mEPSC frequency (Hz)	WT	1.307 ± 0.356		39
	mEPSC frequency (Hz)	WT+I67N	0.2699 ± 0.066	*** p=0.0003 (Kruskal-Wallis test)	36
	mEPSC frequency (Hz)	I67N	0.0583 ± 0.027	**** p<0.0001 (Kruskal-Wallis test)	30
	mEPSC Amplitude (pA)	WT	39.88 ± 1.193		49
	mEPSC Amplitude (pA)	WT+V48F	42.53 ± 1.382	ns p=0.3747 (one-way ANOVA)	47
	mEPSC Amplitude (pA)	V48F	45.88 ± 1.955	* p=0.0124 (one-way ANOVA)	48
	mEPSC Amplitude (pA)	WT	38.67 ± 1.259		54
	mEPSC Amplitude (pA)	WT+D166Y	38.14 ± 1.115	ns p=0.9378 (one-way ANOVA)	43
	mEPSC Amplitude (pA)	D166Y	41.65 ± 1.263	ns p=0.1431 (one-way ANOVA)	50
	mEPSC Amplitude (pA)	Syt1 WT	53.39 ± 2.122		28
	mEPSC Amplitude (pA)	Syt1 KO	46.82 ± 1.759	* p=0.0219 (Unpaired t test)	26
	mEPSC Amplitude (pA)	WT	38.48 ± 1.671		38
	mEPSC Amplitude (pA)	WT+I67N	40.37 ± 2.574	ns p=0.7474 (one-way ANOVA)	32
	mEPSC Amplitude (pA)	I67N	32.83 ± 2.412	ns p=0.2583 (one-way ANOVA)	13
