# Supplementary material for: SNAP25 disease mutations change the energy landscape for synaptic exocytosis due to aberrant SNARE interactions
Source: eLife journal article supplement (doi:10.7554/elife.88619), 2023-07-12
Supplement: fig4-data1 [file elife-88619-fig4-data1-v1.zip]

## Sheet: Sheet1
Figure 4, 10 and Figure 4 - Figure supplement 2
	Property	SNAP25 variant expressed	mean ± SEM	Statistical analysis (comparison to WT)	n
Figure 4, 10 and Figure 4 - Figure supplement 2	EPSC Amplitude (nA)	WT	2.829 ± 0.402		51
	EPSC Amplitude (nA)	WT+V48F	2.224 ± 0.305	ns p= 0.4117 (Brown-Forsythe and Welch ANOVA)	48
	EPSC Amplitude (nA)	V48F	0.8373 ± 0.135	**** p<0.0001 (Brown-Forsythe and Welch ANOVA)	49
	EPSC Amplitude (nA)	WT	3.237 ± 0.367		55
	EPSC Amplitude (nA)	WT+D166Y	1.688 ± 0.220	** p<0.0010 (Brown-Forsythe and Welch ANOVA)	43
	EPSC Amplitude (nA)	D166Y	0.6830 ± 0.076	**** p<0.0001 (Brown-Forsythe and Welch ANOVA)	50
	EPSC Amplitude (nA)	Syt1 WT	8.134 ± 0.745		19
	EPSC Amplitude (nA)	Syt1 KO	0.2249 ± 0.025	**** p<0.0001 (Welch's t test)	26
	EPSC Amplitude (nA)	WT	1.812 ± 0.303		39
	EPSC Amplitude (nA)	WT+I67N	0.6238 ± 0.226	** p=0.0049 (Brown-Forsythe and Welch ANOVA)	37
	EPSC Amplitude (nA)	I67N	0.0475 ± 0.009	**** p<0.0001 (Brown-Forsythe and Welch ANOVA)	30
	EPSC Charge (pC)	WT	29.44 ± 4.667		50
	EPSC Charge (pC)	WT+V48F	28.96 ± 3.136	ns p=0.9938 (one-way ANOVA)	50
	EPSC Charge (pC)	V48F	21.95 ± 3.098	ns p=0.2791 (one-way ANOVA)	45
	EPSC Charge (pC)	WT	30.76 ± 4.438		56
	EPSC Charge (pC)	WT+D166Y	21.20 ± 2.506	ns p= 0.1241 (Brown-Forsythe and Welch ANOVA)	35
	EPSC Charge (pC)	D166Y	17.41 ± 1.809	* p= 0.0136 (Brown-Forsythe and Welch ANOVA)	44
	EPSC Charge (pC)	Syt1 WT	79.45 ± 7.990		19
	EPSC Charge (pC)	Syt1 KO	13.23 ± 3.211	**** p<0.0001 (Welch's t test)	20
	EPSC Charge (pC)	WT	18.23 ± 3.790		24
	EPSC Charge (pC)	WT+I67N	9.525 ± 4.059	ns p=0.1870 (Unpaired t test)	10
	EPSC Charge (pC)	I67N	not determined		0
	Synchronous release/ overall charge	WT	0.9027 ± 0.014		50
	Synchronous release/ overall charge	WT+V48F	0.7768 ± 0.023	**** p<0.0001 (Brown-Forsythe and Welch ANOVA)	50
	Synchronous release/ overall charge	V48F	0.5813 ± 0.032	**** p<0.0001 (Brown-Forsythe and Welch ANOVA)	45
	Synchronous release/ overall charge	WT	0.8832 ± 0.018		56
	Synchronous release/ overall charge	WT+D166Y	0.7754 ± 0.017	*** p=0.0004 (one-way ANOVA)	35
	Synchronous release/ overall charge	D166Y	0.5354 ± 0.021	**** p<0.0001 (one-way ANOVA)	44
	Synchronous release/ overall charge	Syt1 WT	0.9121 ± 0.012		19
	Synchronous release/ overall charge	Syt1 KO	0.4786 ± 0.045	**** p<0.0001 (Welch's t test)	20
	Synchronous release/ overall charge	WT	0.9201 ± 0.026		24
	Synchronous release/ overall charge	WT+I67N	0.9526 ± 0.032	ns p=0.4824 (Unpaired t test)	10
	Synchronous release/ overall charge	I67N	not determined		0
	Synchronous Release (pC)	WT	26.82 ± 4.383		50
	Synchronous Release (pC)	WT+V48F	23.22 ± 2.615	ns p= 0.7309 (Brown-Forsythe and Welch ANOVA)	50
	Synchronous Release (pC)	V48F	13.15 ± 2.035	* p= 0.0121 (Brown-Forsythe and Welch ANOVA)	45
	Synchronous Release (pC)	WT	26.56 ± 3.824		56
	Synchronous Release (pC)	WT+D166Y	16.67 ± 2.071	ns p= 0.0503 (Brown-Forsythe and Welch ANOVA)	35
	Synchronous Release (pC)	D166Y	10.04 ± 1.152	*** p= 0.0002 (Brown-Forsythe and Welch ANOVA)	44
	Synchronous Release (pC)	Syt1 WT	72.13 ± 7.238		19
	Synchronous Release (pC)	Syt1 KO	5.655 ± 1.226	**** p<0.0001 (Welch's t test)	20
	Asynchronous Release (pC)	WT	3.644 ± 0.720		36
	Asynchronous Release (pC)	WT+V48F	6.382 ± 0.721	* p= 0.0175 (Brown-Forsythe and Welch ANOVA)	45
	Asynchronous Release (pC)	V48F	9.210 ± 1.476	** p= 0.0025 (Brown-Forsythe and Welch ANOVA)	43
	Asynchronous Release (pC)	WT	5.873 ± 1.209		40
	Asynchronous Release (pC)	WT+D166Y	4.671 ± 0.620	ns p=0.5732 (one-way ANOVA)	34
	Asynchronous Release (pC)	D166Y	7.366 ± 0.754	ns p=0.3880 (one-way ANOVA)	44
	Asynchronous Release (pC)	Syt1 WT	7.318 ± 1.204		19
	Asynchronous Release (pC)	Syt1 KO	7.976 ± 2.302	ns p=0.8019 (Welch's t test)	19
	Fast time constant (ms)	WT	5.175 ± 0.184		50
	Fast time constant (ms)	WT+V48F	7.257 ± 0.630	** p= 0.0049 (Brown-Forsythe and Welch ANOVA)	50
	Fast time constant (ms)	V48F	12.73 ± 1.300	**** p<0.0001 (Brown-Forsythe and Welch ANOVA)	45
	Fast time constant (ms)	WT	5.973 ± 0.237		56
	Fast time constant (ms)	WT+D166Y	5.973 ± 0.237	ns p= 0.1257 (Brown-Forsythe and Welch ANOVA)	35
	Fast time constant (ms)	D166Y	14.42 ± 1.392	**** p<0.0001 (Brown-Forsythe and Welch ANOVA)	44
	Fast time constant (ms)	Syt1 WT	8.072 ± 0.345		19
	Fast time constant (ms)	Syt1 KO	42.67 ± 6.514	**** p<0.0001 (Welch's t test)	20
	Slow time constant (s)	WT	0.201 ± 0.035		36
	Slow time constant (s)	WT+V48F	0.139 ± 0.021	ns p=0.2270 (one-way ANOVA)	45
	Slow time constant (s)	V48F	0.181 ± 0.030	ns p=0.8456 (one-way ANOVA)	43
	Slow time constant (s)	WT	0.188 ± 0.033		40
	Slow time constant (s)	WT+D166Y	0.138 ± 0.0126	ns p=0.2996 (one-way ANOVA)	34
	Slow time constant (s)	D166Y	0.159 ± 0.023	ns p=0.6111 (one-way ANOVA)	44
	Slow time constant (s)	Syt1 WT	0.200 ± 0.032		19
	Slow time constant (s)	Syt1 KO	0.283 ± 0.050	ns p=0.1664 (Unpaired t test)	19
