# Supplementary material for: SNAP25 disease mutations change the energy landscape for synaptic exocytosis due to aberrant SNARE interactions
Source: eLife journal article supplement (doi:10.7554/elife.88619), 2023-07-12
Supplement: fig5-data1 [file elife-88619-fig5-data1-v1.zip]

## Sheet: Sheet1
Figure 5 + 11
	Property	SNAP25 variant expressed	mean ± SEM	Statistical analysis (comparison to WT)	n
Figure 5 + 11	RRP (250 mOsm) (nC)	WT	0.154 ± 0.038		28
	RRP (250 mOsm) (nC)	WT+V48F	0.116 ± 0.020	ns p=0.5118 (one-way ANOVA)	30
	RRP (250 mOsm) (nC)	V48F	0.128 ± 0.023	ns p=0.7334 (one-way ANOVA)	29
	RRP (250 mOsm) (nC)	WT	0.120 ± 0.020		33
	RRP (250 mOsm) (nC)	WT+D166Y	0.090 ± 0.014	ns p=0.3191 (one-way ANOVA)	30
	RRP (250 mOsm) (nC)	D166Y	0.081 ± 0.013	ns p=0.1494 (one-way ANOVA)	35
	RRP (250 mOsm) (nC)	Syt1 WT	0.507 ± 0.093		23
	RRP (250 mOsm) (nC)	Syt1 KO	0.233 ± 0.043	* p=0.0115 (Welch's t test)	18
	RRP (250 mOsm) (nC)	WT	0.075 ± 0.023		21
	RRP (250 mOsm) (nC)	WT+I67N	0.009 ± 0.006	* p=0.0155 (Kruskal-Wallis test)	15
	RRP (250 mOsm) (nC)	I67N	0.000 ± 0.000	** p=0.0049 (Kruskal-Wallis test)	8
	RRP (500 mOsm) (nC)	WT	0.663 ± 0.094		28
	RRP (500 mOsm) (nC)	WT+V48F	0.388 ± 0.046	* p= 0.0236 (Brown-Forsythe and Welch ANOVA)	30
	RRP (500 mOsm) (nC)	V48F	0.341 ± 0.040	** p= 0.0064 (Brown-Forsythe and Welch ANOVA)	29
	RRP (500 mOsm) (nC)	WT	0.783 ± 0.083		33
	RRP (500 mOsm) (nC)	WT+D166Y	0.329 ± 0.040	**** p<0.0001 (Brown-Forsythe and Welch ANOVA)	30
	RRP (500 mOsm) (nC)	D166Y	0.166 ± 0.019	**** p<0.0001 (Brown-Forsythe and Welch ANOVA)	35
	RRP (500 mOsm) (nC)	Syt1 WT	2.089 ± 0.259		23
	RRP (500 mOsm) (nC)	Syt1 KO	1.458 ± 0.195	ns p=0.0548 (Unpaired t test)	26
	RRP (500 mOsm) (nC)	WT	0.415 ± 0.079		21
	RRP (500 mOsm) (nC)	WT+I67N	0.171 ± 0.056	* p= 0.0327 (Brown-Forsythe and Welch ANOVA)	15
	RRP (500 mOsm) (nC)	I67N	0.145 ± 0.023	** p= 0.0065 (Brown-Forsythe and Welch ANOVA)	8
	RRP0.25/RRP0.5	WT	0.217 ± 0.028		28
	RRP0.25/RRP0.5	WT+V48F	0.248 ± 0.034	ns p=0.7153 (one-way ANOVA)	30
	RRP0.25/RRP0.5	V48F	0.357 ± 0.033	** p=0.0052 (one-way ANOVA)	29
	RRP0.25/RRP0.5	WT	0.178 ± 0.030		33
	RRP0.25/RRP0.5	WT+D166Y	0.278 ± 0.036	ns p=0.0964 (one-way ANOVA)	30
	RRP0.25/RRP0.5	D166Y	0.425 ± 0.039	**** p<0.0001 (one-way ANOVA)	35
	RRP0.25/RRP0.5	Syt1 WT	0.264 ± 0.032		23
	RRP0.25/RRP0.5	Syt1 KO	0.175 ± 0.026	* p=0.0454 (Unpaired t test)	18
	RRP0.25/RRP0.5	WT	0.172 ± 0.065		21
	RRP0.25/RRP0.5	WT+I67N	0.140 ± 0.085	ns p=0.0931 (Kruskal-Wallis test)	15
	RRP0.25/RRP0.5	I67N	0.000 ± 0.000	* p=0.0102 (Kruskal-Wallis test)	8
	Release probability	WT	0.045 ± 0.008		24
	Release probability	WT+V48F	0.067 ± 0.009	ns p=0.1084 (one-way ANOVA)	25
	Release probability	V48F	0.063 ± 0.008	ns p=0.2518 (one-way ANOVA)	22
	Release probability	WT	0.050 ± 0.006		33
	Release probability	WT+D166Y	0.072 ± 0.010	ns p=0.2236 (one-way ANOVA)	24
	Release probability	D166Y	0.106 ± 0.012	*** p=0.0001 (one-way ANOVA)	30
	Release probability	Syt1 WT	0.061 ± 0.005		16
	Release probability	Syt1 KO	0.012 ± 0.003	**** p<0.0001 (Unpaired t test)	21
	RRP (357 mOsm)	WT	0.514 ± 0.170		12
	RRP (357 mOsm)	WT+I67N	0.279 ± 0.071	ns p= 0.3856 (Brown-Forsythe and Welch ANOVA)	16
	RRP (357 mOsm)	I67N	0.086 ± 0.023	ns p= 0.0571 (Brown-Forsythe and Welch ANOVA)	18
	RRP (750 mOsm)	WT	0.529 ± 0.171		13
	RRP (750 mOsm)	WT+I67N	0.953 ± 0.121	ns p=0.8936 (one-way ANOVA)	16
	RRP (750 mOsm)	I67N	0.406 ± 0.047	ns p=0.6638 (one-way ANOVA)	18
	RRP0.357/RRP0.75	WT	1.034 ± 0.176		13
	RRP0.357/RRP0.76	WT+I67N	0.442 ± 0.089	*** p=0.0006 (one-way ANOVA)	16
	RRP0.357/RRP0.77	I67N	0.193 ± 0.040	**** p<0.0001 (one-way ANOVA)	18
