# Supplementary material for: SNAP25 disease mutations change the energy landscape for synaptic exocytosis due to aberrant SNARE interactions
Source: eLife journal article supplement (doi:10.7554/elife.88619), 2023-07-12
Supplement: fig6-data1 [file elife-88619-fig6-data1-v2.zip]

## Sheet: Sheet1
Figure 6
	Property	SNAP25 variant expressed	mean ± SEM	Statistical analysis (comparison to WT)	n
Figure 6D	kf (s-1)	WT	0.000839 ± 0.000178		23
	kf (s-1)	V48F	0.0163 ± 0.00275	*** p=0.0002 (V48F vs D166Y); *** p=0.0003 (V48F vs Syt1 KO) (Brown-Forsythe and Welch ANOVA)	24
	kf (s-1)	WT	0.000398 ± 7.71e-5		19
	kf (s-1)	D166Y	0.0351 ± 0.00318	*** p=0.0002 (D166Y vs V48F); **** p<0.0001 (D166Y vs Syt1 KO) (Brown-Forsythe and Welch ANOVA)	19
	kf (s-1)	Syt1 WT	0.000241 ± 4.51e-5		23
	kf (s-1)	Syt1 KO	0.00315 ± 0.000696	*** p=0.0003 (Syt1 KO vs V48F); **** p<0.0001 (Syt1KO vs D166Y) (Brown-Forsythe and Welch ANOVA)	26
