# Supplementary material for: SNAP25 disease mutations change the energy landscape for synaptic exocytosis due to aberrant SNARE interactions
Source: eLife journal article supplement (doi:10.7554/elife.88619), 2023-07-12
Supplement: fig7-data1 [file elife-88619-fig7-data1-v1.zip]

## Sheet: Sheet1
Figure 7
	Property	SNAP25 variant expressed	mean ± SEM	Statistical analysis (comparison to WT)	n
Figure 7	Paired pulse ratio (25 ms)	WT	0.753 ± 0.084		12
	Paired pulse ratio (25 ms)	WT+V48F	0.915 ± 0.069	ns p= 0.2727 (Brown-Forsythe and Welch ANOVA)	17
	Paired pulse ratio (25 ms)	V48F	1.664 ± 0.250	** p= 0.0060 (Brown-Forsythe and Welch ANOVA)	15
	Paired pulse ratio (25 ms)	WT	0.685 ± 0.044		17
	Paired pulse ratio (25 ms)	WT+D166Y	0.910 ± 0.103	ns p= 0.1075 (Brown-Forsythe and Welch ANOVA)	18
	Paired pulse ratio (25 ms)	D166Y	1.159 ± 0.063	**** p<0.0001 (Brown-Forsythe and Welch ANOVA)	16
	Priming rate (nC/s)	WT	0.630 ± 0.129		27
	Priming rate (nC/s)	WT+V48F	0.351 ± 0.093	ns p=0.1508 (one-way ANOVA)	17
	Priming rate (nC/s)	V48F	0.220 ± 0.049	* p=0.0295 (one-way ANOVA)	15
	Priming rate (nC/s)	WT	0.630 ± 0.129		27
	Priming rate (nC/s)	WT+D166Y	0.349 ± 0.073	ns p= 0.1252 (Brown-Forsythe and Welch ANOVA)	18
	Priming rate (nC/s)	D166Y	0.259 ± 0.046	* p= 0.0212 (Brown-Forsythe and Welch ANOVA)	16
	RRPev (nC)	WT	0.251 ± 0.042		27
	RRPev (nC)	WT+V48F	0.157 ± 0.045	ns p=0.1793 (one-way ANOVA)	17
	RRPev (nC)	V48F	0.081 ± 0.014	** p=0.0100 (one-way ANOVA)	15
	RRPev (nC)	WT	0.251 ± 0.042		27
	RRPev (nC)	WT+D166Y	0.138 ± 0.024	* p= 0.0484 (Brown-Forsythe and Welch ANOVA)	18
	RRPev (nC)	D166Y	0.089 ± 0.019	** p= 0.0025 (Brown-Forsythe and Welch ANOVA)	16
	Release probability (40 Hz train)	WT	0.277 ± 0.018		27
	Release probability (40 Hz train)	WT+V48F	0.296 ± 0.041	ns p=0.8285 (one-way ANOVA)	17
	Release probability (40 Hz train)	V48F	0.165 ± 0.021	** p=0.0087 (one-way ANOVA)	15
	Release probability (40 Hz train)	WT	0.277 ± 0.018		27
	Release probability (40 Hz train)	WT+D166Y	0.249 ± 0.032	ns p= 0.6889 (Brown-Forsythe and Welch ANOVA)	18
	Release probability (40 Hz train)	D166Y	0.191 ± 0.014	*** p= 0.0009 (Brown-Forsythe and Welch ANOVA)	15
