# Supplementary material for: SNAP25 disease mutations change the energy landscape for synaptic exocytosis due to aberrant SNARE interactions
Source: eLife journal article supplement (doi:10.7554/elife.88619), 2023-07-12
Supplement: fig7-figsupp1-data1 [file elife-88619-fig7-figsupp1-data1-v1.zip]

## Sheet: Sheet1
Figure 7 - Figure supplement 1
	Property	SNAP25 variant expressed	mean ± SEM	Statistical analysis (comparison to WT)	n
Figure 7 supp. 1	Paired pulse ratio (25 ms)	WT	1.274 ± 0.122		25
	Paired pulse ratio (25 ms)	WT+V48F	1.717 ± 0.175	ns p=0.9394 (one-way ANOVA, Dunnett's test comparing to WT)	18
	Paired pulse ratio (25 ms)	V48F	2.232 ± 0.196	*** p=0.0001 (one-way ANOVA, Dunnett's test comparing to WT)	24
	Paired pulse ratio (25 ms)	WT	1.202 ± 0.090		23
	Paired pulse ratio (25 ms)	WT+D166Y	2.027 ± 0.405	* p=0.0157 (one-way ANOVA, Dunnett's test comparing to WT)	15
	Paired pulse ratio (25 ms)	D166Y	1.292 ± 0.096	ns p=0.9394 (one-way ANOVA, Dunnett's test comparing to WT)	15
	Priming rate (nC/s)	WT	0.237 ± 0.063		22
	Priming rate (nC/s)	WT+V48F	0.337 ± 0.077	ns p=0.4088 (one-way ANOVA, Dunnett's test comparing to WT)	18
	Priming rate (nC/s)	V48F	0.192 ± 0.040	ns p=0.8155 (one-way ANOVA, Dunnett's test comparing to WT)	22
	Priming rate (nC/s)	WT	0.239 ± 0.056		23
	Priming rate (nC/s)	WT+D166Y	0.324 ± 0.081	ns p= 0.6337 (Brown-Forsythe and Welch ANOVA, Dunnett's test comparing to WT )	15
	Priming rate (nC/s)	D166Y	0.103 ± 0.023	ns p= 0.0653 (Brown-Forsythe and Welch ANOVA, Dunnett's test comparing to WT )	15
	RRPev (nC)	WT	0.092 ± 0.019		22
	RRPev (nC)	WT+V48F	0.130 ± 0.026	ns p=0.2918 (one-way ANOVA, Dunnett's test comparing to WT)	18
	RRPev (nC)	V48F	0.064 ± 0.012	ns p=0.4549 (one-way ANOVA, Dunnett's test comparing to WT)	22
	RRPev (nC)	WT	0.089 ± 0.015		23
	RRPev (nC)	WT+D166Y	0.106 ± 0.024	ns p=0.6935 (one-way ANOVA, Dunnett's test comparing to WT)	15
	RRPev (nC)	D166Y	0.047 ± 0.009	ns p=0.1499 (one-way ANOVA, Dunnett's test comparing to WT)	15
