# Supplementary material for: SNAP25 disease mutations change the energy landscape for synaptic exocytosis due to aberrant SNARE interactions
Source: eLife journal article supplement (doi:10.7554/elife.88619), 2023-07-12
Supplement: fig8-data1 [file elife-88619-fig8-data1-v1.zip]

## Sheet: Sheet1
Figure 8
	Property	SNAP25 variant expressed	mean ± SEM	Statistical analysis (comparison to WT)	n
Figure 8B-C	% attached SUVs (% of total) (without PIP2)	WT	42.77 ± 1.846		3
	% attached SUVs (% of total) (without PIP2)	V48F	29.64 ± 1.697	**** p<0.0001 (one-way ANOVA)	7
	% attached SUVs (% of total) (without PIP2)	D166Y	20.86 ± 1.113	**** p<0.0001 (one-way ANOVA)	12
	% attached SUVs (% of total) (without PIP2)	I67N	16.37 ± 1.018	**** p<0.0001 (one-way ANOVA)	12
	% attached SUVs (% of total) (with PIP2)	WT	65.99 ± 0.329		4
	% attached SUVs (% of total) (with PIP2)	V48F	59.08 ± 0.819	*** p=0.0002 (one-way ANOVA)	4
	% attached SUVs (% of total) (with PIP2)	D166Y	59.98 ± 1.179	*** p=0.0006 (one-way ANOVA)	4
	% attached SUVs (% of total) (with PIP2)	I67N	58.32 ± 0.644	**** p<0.0001 (one-way ANOVA)	4
Figure 8E	% fusion pre Ca2+ (normalized) -CpxII	WT	31.94 ± 1.222		3
	% fusion pre Ca2+ (normalized) - CpxII	V48F	30.65 ± 1.309	ns p=0.6896 (one-way ANOVA, Dunnett's test comparing to WT)	3
	% fusion pre Ca2+ (normalized) - CpxII	D166Y	18.23 ± 0.733	**** p<0.0001 (one-way ANOVA, Dunnett's test comparing to WT)	3
	% fusion pre Ca2+ (normalized) - CpxII	I67N	5.177 ± 0.588	**** p<0.0001 (one-way ANOVA, Dunnett's test comparing to WT)	3
	% fusion post Ca2+ (normalized) - CpxII	WT	59.24 ± 0.854		3
	% fusion post Ca2+ (normalized) - CpxII	V48F	48.74 ± 1.639	** p=0.0015 (one-way ANOVA, Dunnett's test comparing to WT)	3
	% fusion post Ca2+ (normalized) - CpxII	D166Y	27.14 ± 0.997	**** p<0.0001 (one-way ANOVA, Dunnett's test comparing to WT)	3
	% fusion post Ca2+ (normalized) - CpxII	I67N	20.44 ± 1.536	**** p<0.0001 (one-way ANOVA, Dunnett's test comparing to WT)	3
	% fusion end fusion (normalized) - CpxII	WT	100		3
	% fusion end fusion (normalized) - CpxII	V48F	87.39 ± 1.563	**** p<0.0001 (one-way ANOVA, Dunnett's test comparing to WT)	3
	% fusion end fusion (normalized) - CpxII	D166Y	61.96 ± 0.682	**** p<0.0001 (one-way ANOVA, Dunnett's test comparing to WT)	3
	% fusion end fusion (normalized) - CpxII	I67N	74.03 ± 1.297	**** p<0.0001 (one-way ANOVA, Dunnett's test comparing to WT)	3
	% fusion pre Ca2+ (normalized) + CpxII	WT	0.235 ± 0.4828		3
	% fusion pre Ca2+ (normalized) + CpxII	V48F	14.15 ± 0.303	**** p<0.0001 (one-way ANOVA, Dunnett's test comparing to WT)	3
	% fusion pre Ca2+ (normalized) + CpxII	D166Y	12.71 ± 0.211	**** p<0.0001 (one-way ANOVA, Dunnett's test comparing to WT)	3
	% fusion pre Ca2+ (normalized) + CpxII	I67N	-1.364 ± 0.802	ns p=0.1279 (one-way ANOVA, Dunnett's test comparing to WT)	3
	% fusion post Ca2+ (normalized) + CpxII	WT	58.78 ± 1.531		3
	% fusion post Ca2+ (normalized) + CpxII	V48F	50.66 ± 1.158	** p=0.0012 (one-way ANOVA, Dunnett's test comparing to WT)	3
	% fusion post Ca2+ (normalized) + CpxII	D166Y	27.79 ± 0.550	**** p<0.0001 (one-way ANOVA, Dunnett's test comparing to WT)	3
	% fusion post Ca2+ (normalized) + CpxII	I67N	5.327 ± 0.780	**** p<0.0001 (one-way ANOVA, Dunnett's test comparing to WT)	3
	% fusion end fusion (normalized) + CpxII	WT	100		3
	% fusion end fusion (normalized) + CpxII	V48F	85.19 ± 2.216	*** p=0.0003 (one-way ANOVA, Dunnett's test comparing to WT)	3
	% fusion end fusion (normalized) + CpxII	D166Y	59.44 ± 1.834	**** p<0.0001 (one-way ANOVA, Dunnett's test comparing to WT)	3
	% fusion end fusion (normalized) + CpxII	I67N	34.85 ± 1.396	**** p<0.0001 (one-way ANOVA, Dunnett's test comparing to WT)	3
