# Supplementary material for: SNAP25 disease mutations change the energy landscape for synaptic exocytosis due to aberrant SNARE interactions
Source: eLife journal article supplement (doi:10.7554/elife.88619), 2023-07-12
Supplement: fig9-data1 [file elife-88619-fig9-data1-v1.zip]

## Sheet: Sheet1
Figure 9
	Property	SNAP25 variant expressed	mean ± SEM	Statistical analysis (comparison to WT)	n
Figure 9C	% fusion pre Ca2+ (normalized) -CpxII	WT	45.55 ± 2.90		3
	% fusion pre Ca2+ (normalized) - CpxII	V48F	62.59 ± 2.88	* p=0.0233 (one-way ANOVA, Dunnett's test comparing to WT)	3
	% fusion pre Ca2+ (normalized) - CpxII	D166Y	124.0 ± 5.05	**** p<0.0001 (one-way ANOVA, Dunnett's test comparing to WT)	3
	% fusion pre Ca2+ (normalized) - CpxII	I67N	11.60 ± 2.78	*** p=0.0004 (one-way ANOVA, Dunnett's test comparing to WT)	3
	% fusion post Ca2+ (normalized) - CpxII	WT	46.95 ± 4.01		3
	% fusion post Ca2+ (normalized) - CpxII	V48F	59.87 ± 2.52	ns p=0.0526 (one-way ANOVA, Dunnett's test comparing to WT)	3
	% fusion post Ca2+ (normalized) - CpxII	D166Y	137.2 ± 3.79	**** p<0.0001 (one-way ANOVA, Dunnett's test comparing to WT)	3
	% fusion post Ca2+ (normalized) - CpxII	I67N	12.81 ± 2.103	*** p=0.0002 (one-way ANOVA, Dunnett's test comparing to WT)	3
	% fusion end fusion (normalized) - CpxII	WT	100 ± 5.93		3
	% fusion end fusion (normalized) - CpxII	V48F	132.7 ± 5.31	** p=0.0026 (one-way ANOVA, Dunnett's test comparing to WT)	3
	% fusion end fusion (normalized) - CpxII	D166Y	202.1 ± 4.15	**** p<0.0001 (one-way ANOVA, Dunnett's test comparing to WT)	3
	% fusion end fusion (normalized) - CpxII	I67N	79.36 ± 1.86	* p=0.0319 (one-way ANOVA, Dunnett's test comparing to WT)	3
	% fusion pre Ca2+ (normalized) + CpxII	WT	22.26 ± 2.18		3
	% fusion pre Ca2+ (normalized) + CpxII	V48F	58.97 ± 2.41	**** p<0.0001 (one-way ANOVA, Dunnett's test comparing to WT)	3
	% fusion pre Ca2+ (normalized) + CpxII	D166Y	84.12 ± 2.94	**** p<0.0001 (one-way ANOVA, Dunnett's test comparing to WT)	3
	% fusion pre Ca2+ (normalized) + CpxII	I67N	6.56 ± 1.24	** p=0.0032 (one-way ANOVA, Dunnett's test comparing to WT)	3
	% fusion post Ca2+ (normalized) + CpxII	WT	49.03 ± 2.11		3
	% fusion post Ca2+ (normalized) + CpxII	V48F	67.16 ± 2.90	ns p=0.0548 (one-way ANOVA, Dunnett's test comparing to WT)	3
	% fusion post Ca2+ (normalized) + CpxII	D166Y	131.5 ± 8.08	**** p<0.0001 (one-way ANOVA, Dunnett's test comparing to WT)	3
	% fusion post Ca2+ (normalized) + CpxII	I67N	8.24 ± 2.18	*** p=0.0006 (one-way ANOVA, Dunnett's test comparing to WT)	3
	% fusion end fusion (normalized) + CpxII	WT	100.0 ± 2.73		3
	% fusion end fusion (normalized) + CpxII	V48F	139.2 ± 3.67	*** p=0.0001 (one-way ANOVA, Dunnett's test comparing to WT)	3
	% fusion end fusion (normalized) + CpxII	D166Y	205.5 ± 4.40	**** p<0.0001 (one-way ANOVA, Dunnett's test comparing to WT)	3
	% fusion end fusion (normalized) + CpxII	I67N	77.24 ± 3.18	** p=0.0049 (one-way ANOVA, Dunnett's test comparing to WT)	3
Figure 9D	SNAP25 fold change relative to WT (stx1A SUVs)	V48F	2.082 ± 0.174	** p=0.0034 (one sample t-test comparing to 1)	5
	SNAP25 fold change relative to WT (stx1A SUVs)	D166Y	8.238 ± 1.255	** p= 0.0022 (one sample t-test comparing to 1)	6
	SNAP25 fold change relative to WT (stx1A SUVs)	I67N	1.430 ± 0.2323	ns p=0.1379 (one sample t-test comparing to 1)	5
	SNAP25 fold change relative to WT (VAMP2 SUVs)	V48F	4.598 ± 1.408	ns p=0.0629 (one sample t-test comparing to 1)	5
	SNAP25 fold change relative to WT (VAMP2 SUVs)	D166Y	15.05 ± 4.304	* p=0.0223 (one sample t-test comparing to 1)	6
	SNAP25 fold change relative to WT (VAMP2 SUVs)	I67N	1.122 ± 0.149	ns p=0.460 (one sample t-test comparing to 1)	5
	SNAP25 fold change relative to WT (Syt1 SUVs)	V48F	0.835 ± 0.084	ns p=0.143 (one sample t-test comparing to 1)	4
	SNAP25 fold change relative to WT (Syt1 SUVs)	D166Y	3.22 ± 1.573	ns p=0.231 (one sample t-test comparing to 1)	5
	SNAP25 fold change relative to WT (Syt1 SUVs)	I67N	0.665 ± 0.201	ns p=0.194 (one sample t-test comparing to 1)	4
	SNAP25 fold change relative to WT (Syt1/VAMP2 SUVs)	V48F	1.975 ± 0.1028	** p=0.0025 (one sample t-test comparing to 1)	4
	SNAP25 fold change relative to WT (Syt1/VAMP2 SUVs)	D166Y	18.48 ± 1.161	**** p<0.0001 (one sample t-test comparing to 1)	5
	SNAP25 fold change relative to WT (Syt1/VAMP2 SUVs)	I67N	0.310 ± 0.0871	** p=0.0042 (one sample t-test comparing to 1)	4
	SNAP25 fold change relative to WT (Stx1A & Syt1/VAMP2 SUVs)	V48F	1.510 ± 0.551	ns p= 0.4229 (one sample t-test comparing to 1)	4
	SNAP25 fold change relative to WT (Stx1A & Syt1/VAMP2 SUVs)	D166Y	8.432 ± 1.613	** p= 0.0058 (one sample t-test comparing to 1)	6
	SNAP25 fold change relative to WT (Stx1A & Syt1/VAMP2 SUVs)	I67N	0.708 ± 0.169	ns p= 0.1453 (one sample t-test comparing to 1)	6
