# Supplementary material for: SNAP25 disease mutations change the energy landscape for synaptic exocytosis due to aberrant SNARE interactions
Source: eLife journal article supplement (doi:10.7554/elife.88619), 2023-07-12
Supplement: fig9-figsupp1-data2 [file elife-88619-fig9-figsupp1-data2-v1.zip]

# Figure 9 – Supplement 1

## Raw data

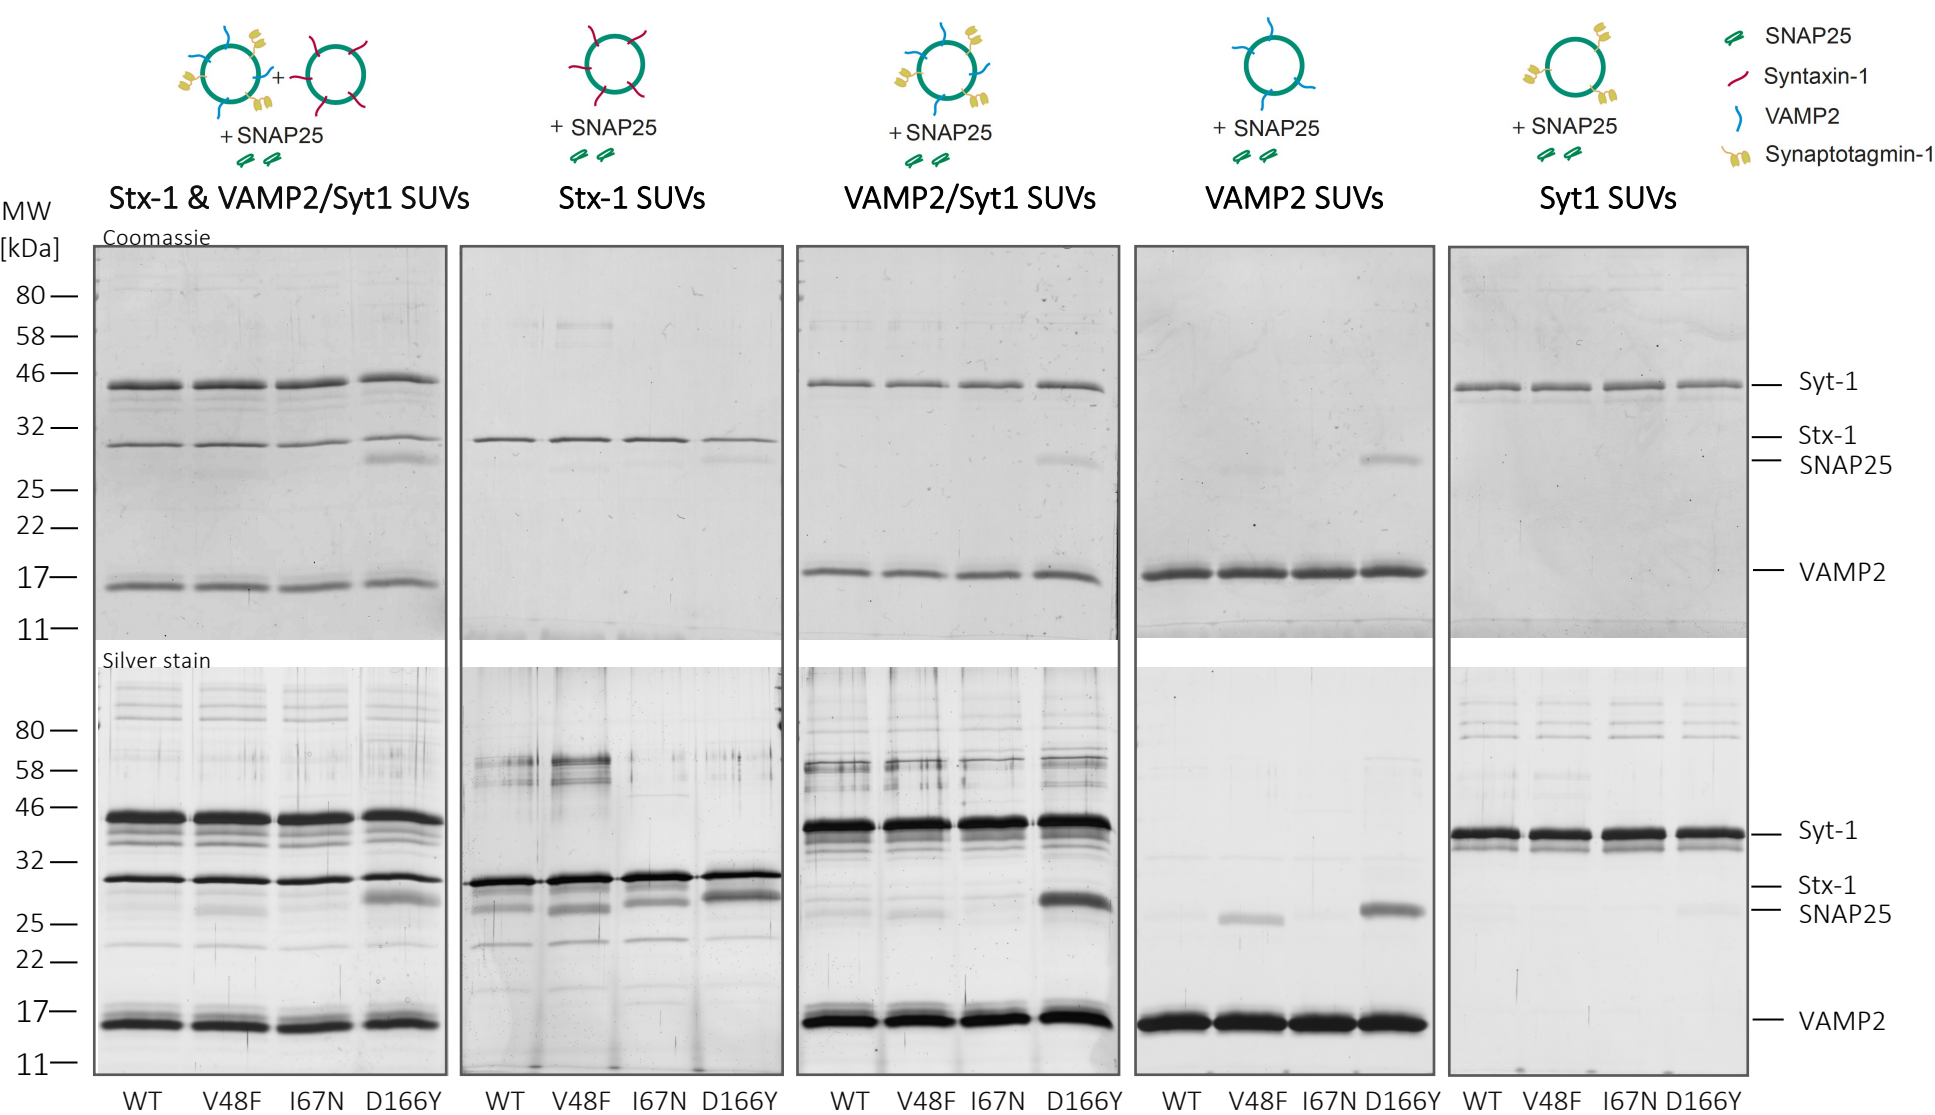

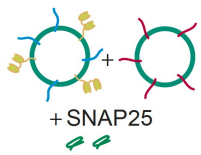

# Stx-1 & VAMP2/Syt1 SUVs

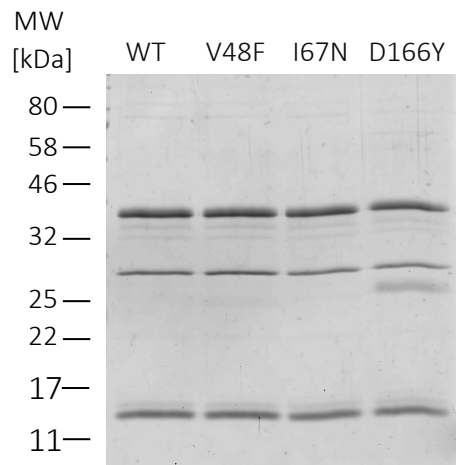

Coomassie

n1  
WT V48F I67N D166Y

n2  
WT V48F I67N D166Y

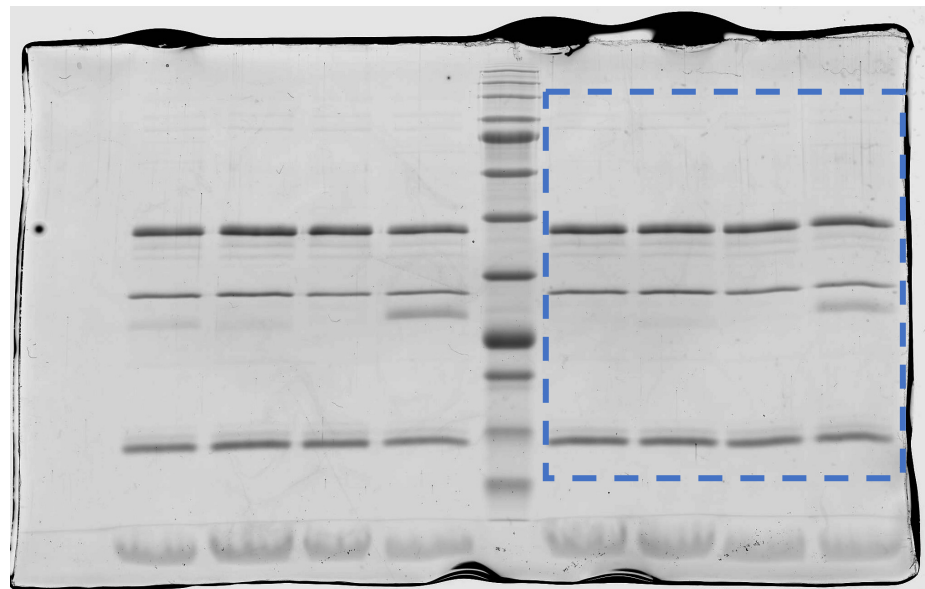

Coomassie

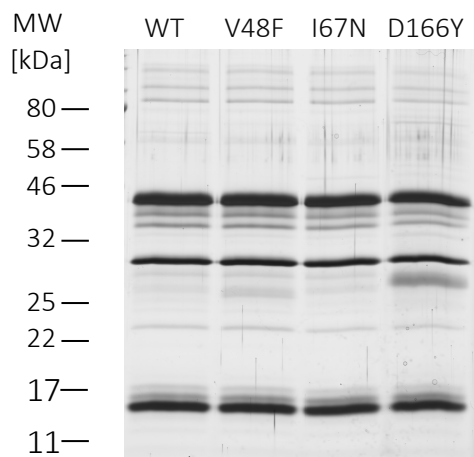

Silver stain

n1  
WT V48F I67N D166Y

n2  
WT V48F I67N D166Y

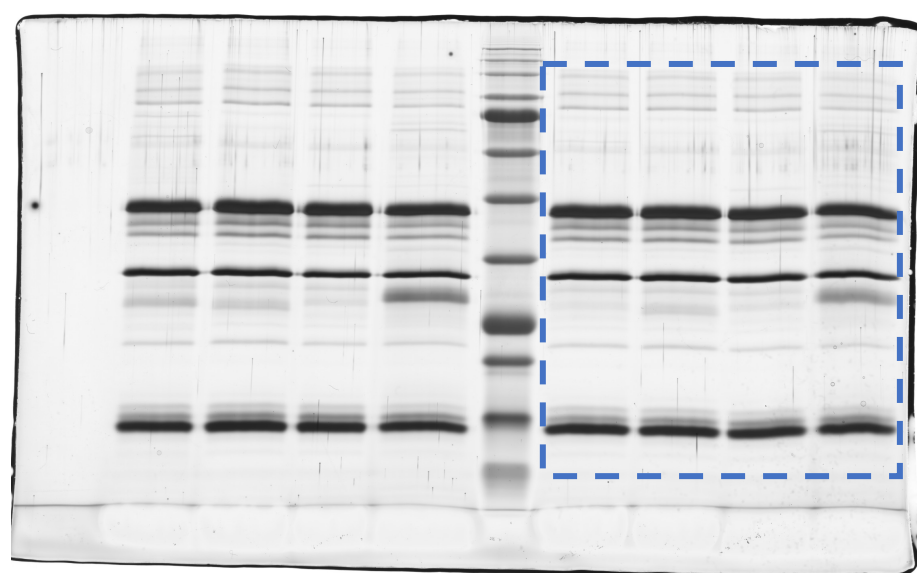

Silverstain

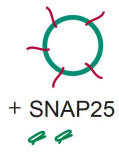

Stx-1 SUVs

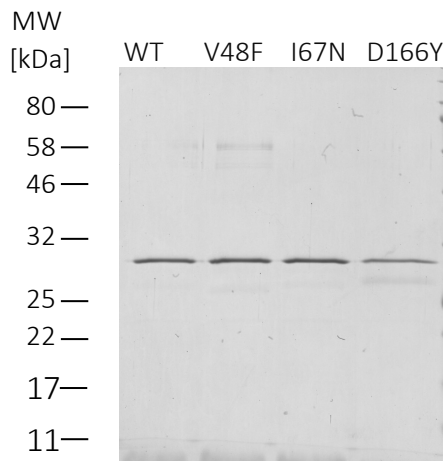

Coomassie

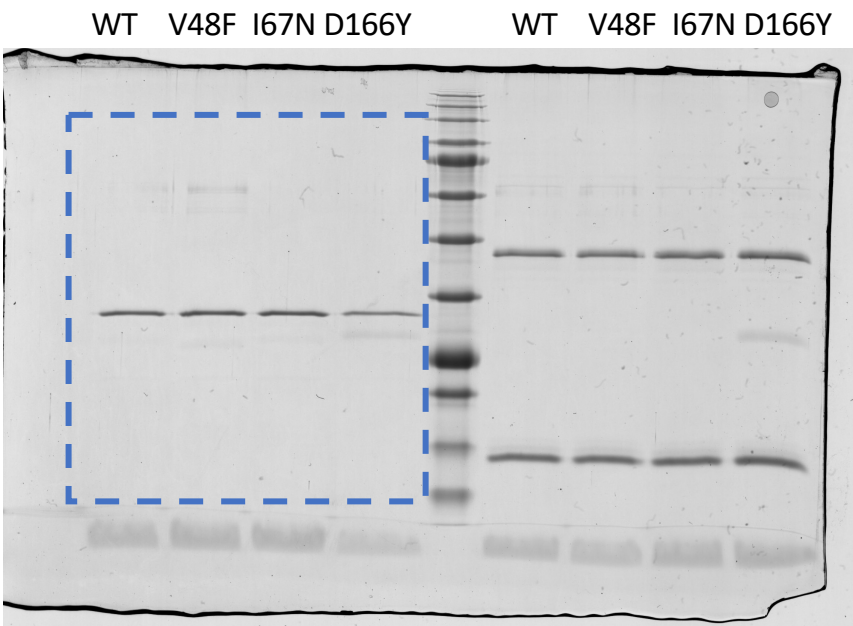

Coomassie

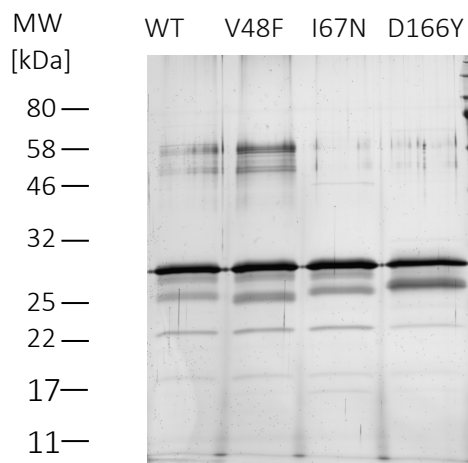

Silver stain

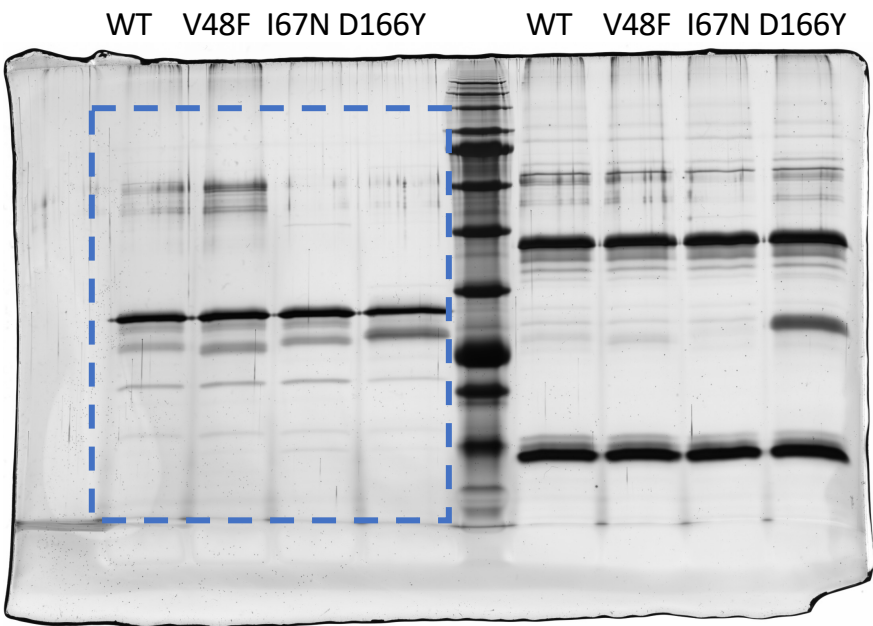

Silverstain

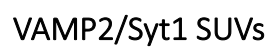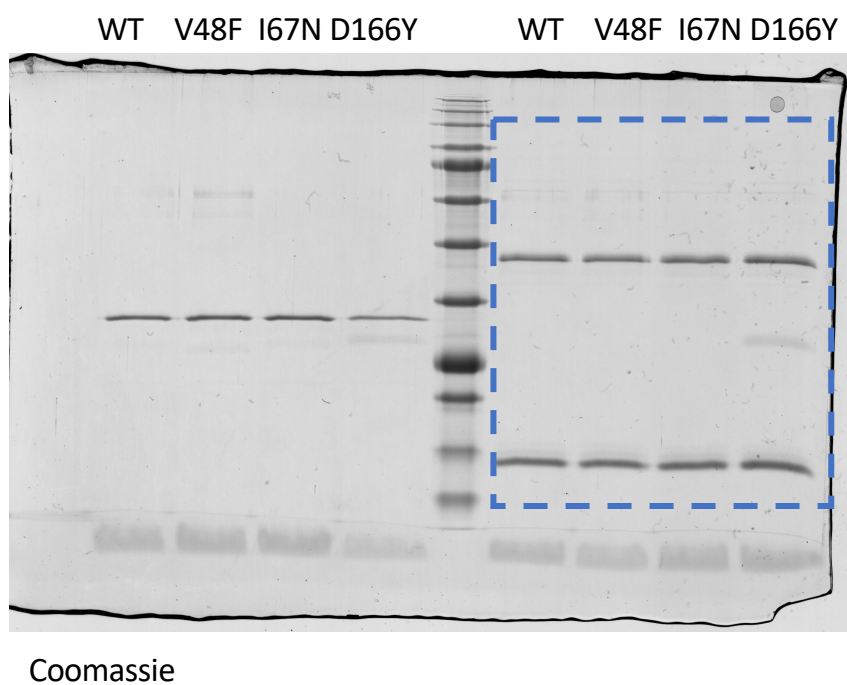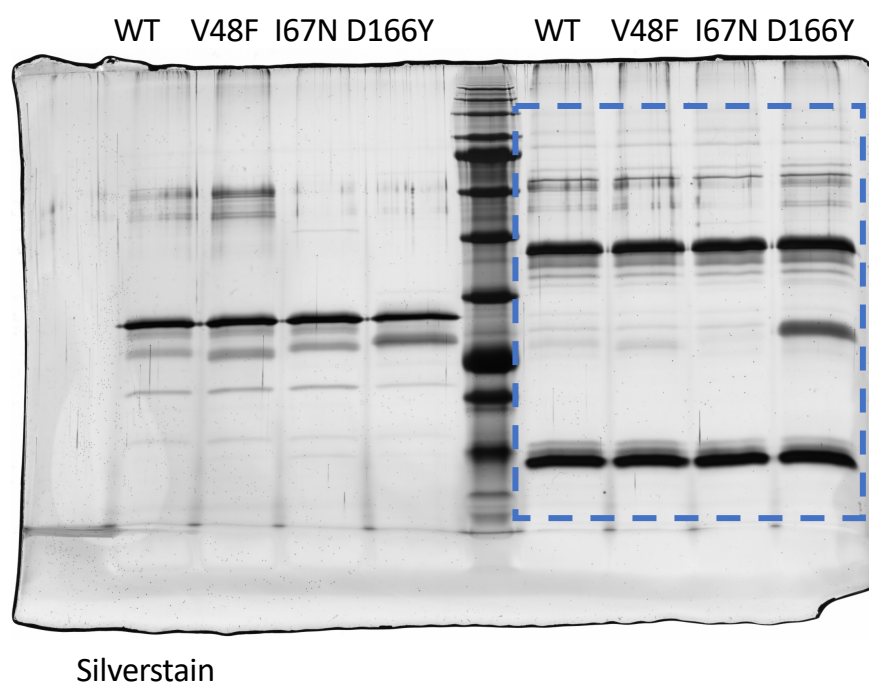



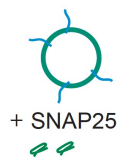

## VAMP2 SUVs

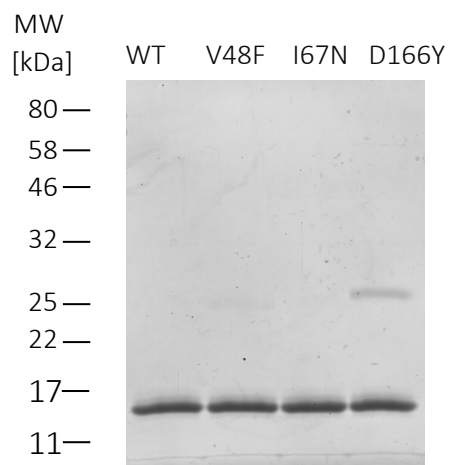

Coomassie

SNAP25

VAMP2

WT V48F I67N D166Y WT V48F I67N D166Y

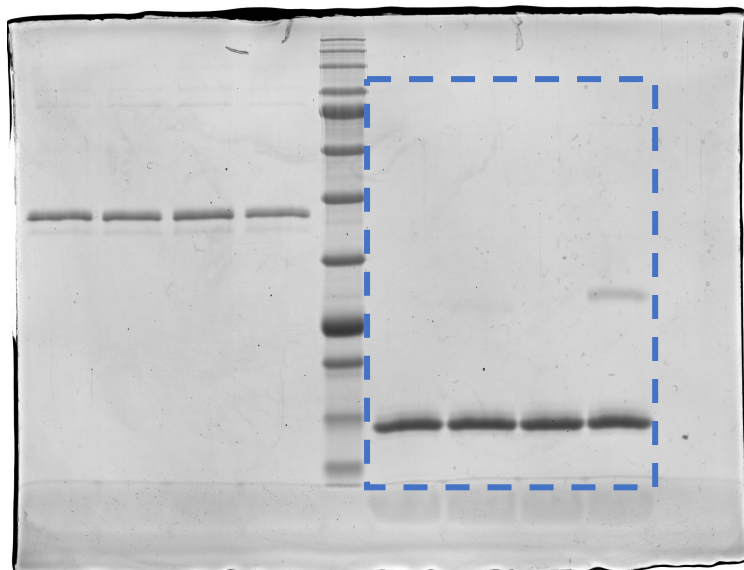

Coomassie

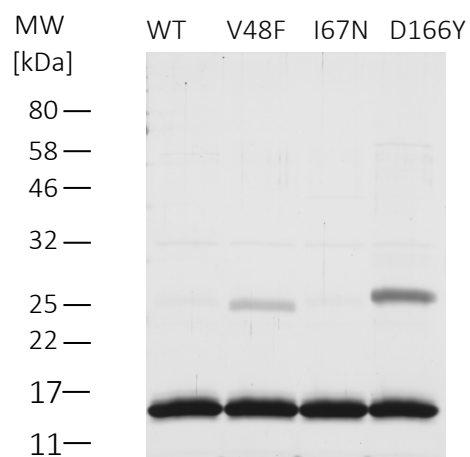

Silver stain

SNAP25

VAMP2

WT V48F I67N D166Y WT V48F I67N D166Y

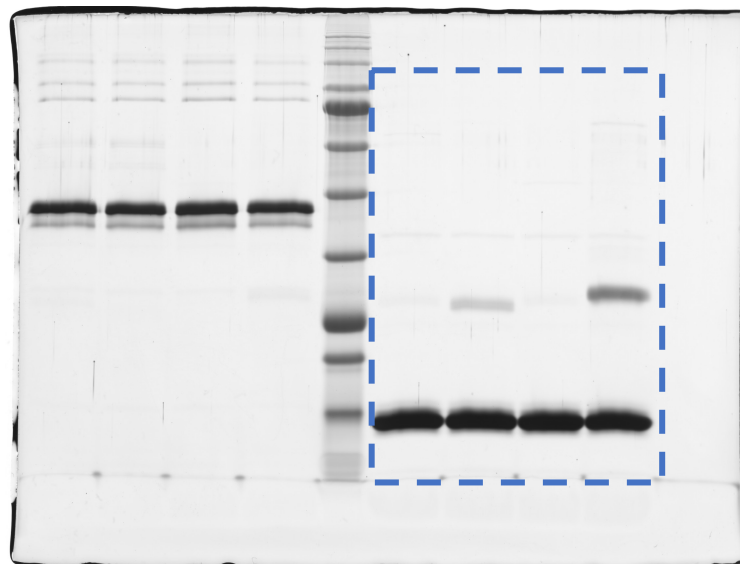

Silverstain

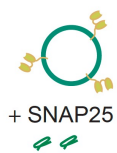

Syt1 SUVs

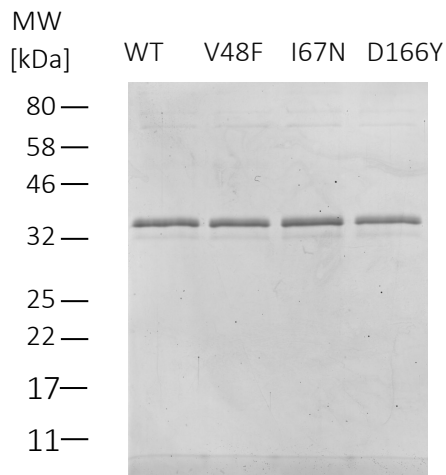

Coomassie

WT V48F I67N D166Y WT V48F I67N D166Y

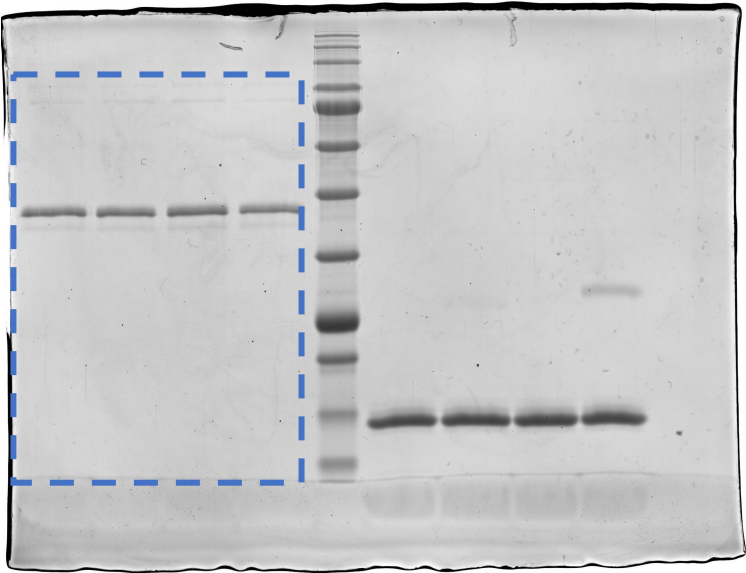

Coomassie

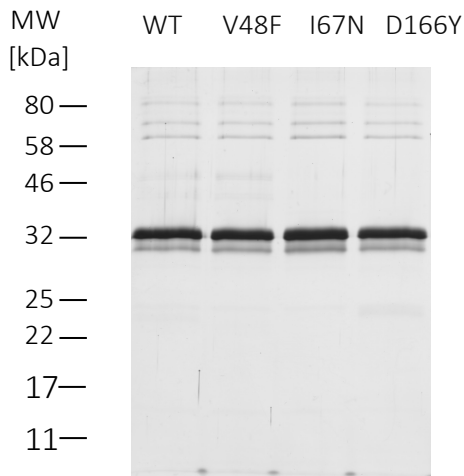

Silver stain

WT V48F I67N D166Y WT V48F I67N D166Y

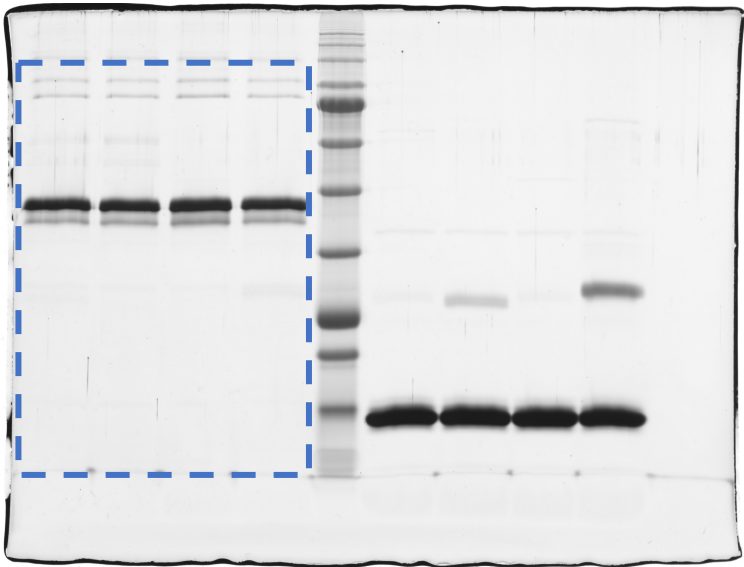

Silverstain
