# Supplementary material for: SNAP25 disease mutations change the energy landscape for synaptic exocytosis due to aberrant SNARE interactions
Source: eLife journal article supplement (doi:10.7554/elife.88619), 2023-07-12
Supplement: fig9-figsupp2-data1 [file elife-88619-fig9-figsupp2-data1-v1.zip]

## Sheet: Sheet1
Figure 9 - Figure Supplement 2
	Property	SNAP25 variant expressed	mean ± SEM	Statistical analysis (comparison to WT)	n
Figure 9 - Figure Supplement 2 E,D	Sum of the interaction energies (48-52)	WT	-16.51 ± 0.18		4
	Sum of the interaction energies (48-52)	V48F	-16.86 ± 0.42	ns p=0.3556 (one-way ANOVA)	4
	Sum of the interaction energies (48-52)	D166Y	-16.23 ± 0.21	ns p=0.3556 (one-way ANOVA)	4
	Coulomb Interactions (48-52)	WT	-13.36 ± 0.24		4
	Coulomb Interactions (48-52)	V48F	-13.00 ± 0.23	ns p=0.4716 (one-way ANOVA)	4
	Coulomb Interactions (48-52)	D166Y	-13.02 ± 0.19	ns p=0.4716 (one-way ANOVA)	4
	van der Waals Interactions (48-52)	WT	-3.16 ± 0.07		4
	van der Waals Interactions (48-52)	V48F	-3.86 ± 0.24	* p= 0.0189 (Tukey HSD)	4
	van der Waals Interactions (48-52)	D166Y	-3.22 ± 0.02	ns p= 0.9567 (Tukey HSD)	4
	Sum of the interaction energies (162-166)	WT	-7.11 ± 0.87		4
	Sum of the interaction energies (162-166)	V48F	-6.48 ± 0.24	ns p= 0.7029 (Tukey HSD)	4
	Sum of the interaction energies (162-166)	D166Y	-21.75 ± 0.25	**** p< 0.0001 (Tukey HSD)	4
	Coulomb Interactions (162-166)	WT	-3.00 ± 0.86		4
	Coulomb Interactions (162-166)	V48F	-2.52 ± 0.23	ns p= 0.8572 (Tukey HSD)	4
	Coulomb Interactions (162-166)	D166Y	-14.18 ± 0.64	**** p< 0.0001 (Tukey HSD)	4
	van der Waals Interactions (162-166)	WT	-4.11 ± 0.04		4
	van der Waals Interactions (162-166)	V48F	-3.96 ± 0.03	ns p=0.9769 (Tukey HSD)	4
	van der Waals Interactions (162-166)	D166Y	-7.57 ± 0.88	** p= 0.0024 (Tukey HSD)	4
