# Supplementary material for: SNAP25 disease mutations change the energy landscape for synaptic exocytosis due to aberrant SNARE interactions
Source: eLife journal article supplement (doi:10.7554/elife.88619), 2023-07-12
Supplement: fig12-data1 [file elife-88619-fig12-data1-v1.zip]

## Sheet: Sheet1
Figure 12
	Property	SNAP25 variant expressed	mean ± SEM	Statistical analysis (comparison to WT)	n
Figure 12	mEPSC frequency (Hz)	WT	2.039 ± 0.404		19
	mEPSC frequency (Hz)	I67N/4K	2.819 ± 0.587	ns p=0.7471 (Mann-Whitney t test)	25
	mEPSC frequency (Hz)	4K	12.90 ± 1.946		12
	mEPSC Amplitude (pA)	WT	45.13 ± 2.743		19
	mEPSC Amplitude (pA)	I67N/4K	40.31 ± 2.485	ns p=0.2021 (Unpaired t test)	25
	mEPSC Amplitude (pA)	4K	58.72 ± 5.323		12
	EPSC Amplitude (nA)	WT	3.116 ± 0.778		19
	EPSC Amplitude (nA)	I67N/4K	0.267 ± 0.120	**** p<0.0001 (Mann-Whitney t test)	25
	EPSC Amplitude (nA)	4K	6.725 ± 0.657		13
