# Supplementary figures and images for: SNAP25 disease mutations change the energy landscape for synaptic exocytosis due to aberrant SNARE interactions
Source: eLife journal article supplement (doi:10.7554/elife.88619), 2023-07-12

VCP exposure time: 20s

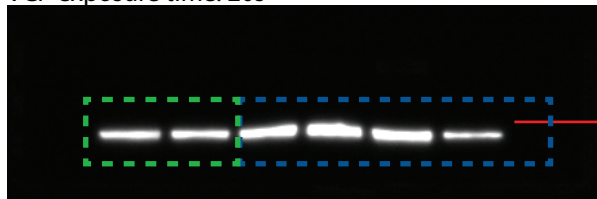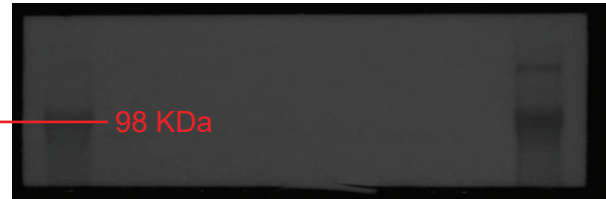

SNAP25 exposure time: 30s

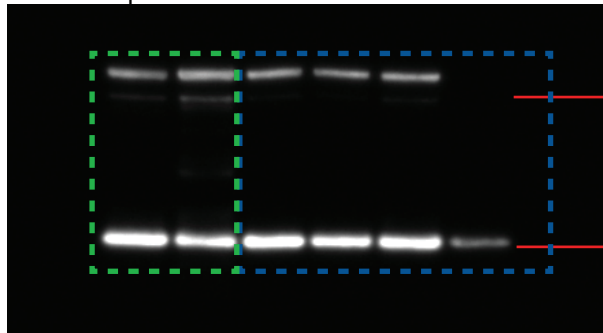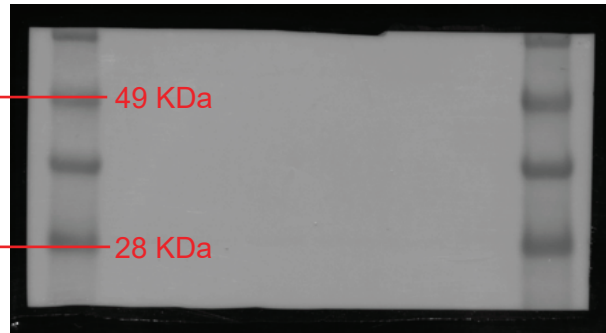

**Figure 2**

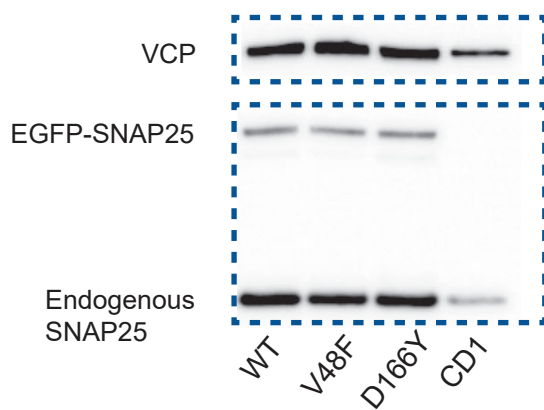

**Figure 10**

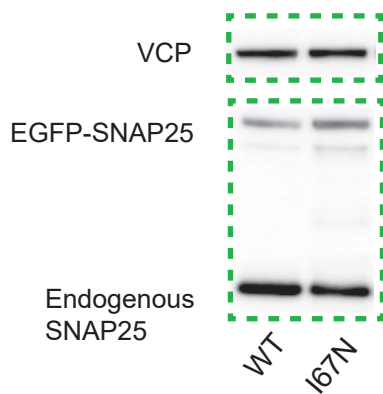

Supplement: fig2-data3 [file elife-88619-fig2-data3-v1.zip]
